1 **Are socio-demographic factors associated with electronic Health**  
2 **Information System utilization? *A cross sectional study of the District***  
3 ***Health Information System -2 (DHIS-2) in Burundi***

4  
5 Innocent Yandemye<sup>1</sup> & Alexandre Nimubona<sup>2</sup>

6  
7 <sup>1</sup>Health policy advisor, Ministry of Health, Bujumbura, Burundi  
8 [yandemyeinnocent1989@gmail.com](mailto:yandemyeinnocent1989@gmail.com)

9  
10 <sup>2</sup>Independent Researcher, Burundi country, Burundi [fbpalexine.bi@gmail.com](mailto:fbpalexine.bi@gmail.com)  
11

12 **Abstract**

13 The utilization of Electronic Health Information System is crucial in informing credible decision-  
14 making process, especially in developing countries. We aimed to investigate the socio-  
15 demographic factors of Health workers that are associated with their utilization of the DHIS-2  
16 platform in Burundi. We conducted a cross-sectional study amongst health workers involved in  
17 collecting and validating data in health facilities. The male gender was more associated with the  
18 DHIS-2 effect on the enhancement of health information access ( $\chi^2 = 7.995$ ,  $P = .005$ ) than the  
19 female gender. Marital status was associated with quality information ( $\chi^2 = 6.437$ ,  $P = .011$ ) and  
20 health information management ( $\chi^2 = 5.053$ ,  $P = .025$ ) improvement. The lower time travel to  
21 workplace was associated with the improvement of quality information ( $\chi^2 = 11.224$ ,  $P = .001$ ) and  
22 health information management ( $\chi^2 = 6.568$ ,  $P = .010$ ), training on DHIS-2 ( $\chi^2 = 16.374$ ,  $P = .000$ ),  
23 DHIS-2 compatibility with health facility management tools ( $\chi^2 = 4.726$ ,  $P = .030$ ), national health  
24 information system design ( $\chi^2 = 8.023$ ,  $P = .005$ ), compatibility with primary health information  
25 tools ( $\chi^2 = 9.339$ ,  $P = .002$ ) and the national health policy objective ( $\chi^2 = 9.699$ ,  $P = .002$ ), required  
26 security elements ( $\chi^2 = 14.205$ ,  $P = .000$ ), data transfer security ( $\chi^2 = 6.288$ ,  $P = .012$ ), data protection  
27 against modification ( $\chi^2 = 6.497$ ,  $P = .011$ ), and assurance of personal privacy ( $\chi^2 = 7.650$ ,  $P = .006$ ).

28 The lower educational level was associated with information error minimization ( $\chi^2= 7.243$ ,  $P=$   
29  $.007$ ) and learning ease ( $\chi^2 = 4.175$ ,  $P= .041$ ). The health worker function was associated with  
30 DHIS-2 compatibility with national health policy objective ( $\chi^2 =4.496$ ,  $P= .034$ ). The geographical  
31 area of work was associated with DHIS-2 ease of use and interoperability assurance ( $\chi^2 = 10.287$ ,  
32  $P= .006$ ;  $\chi^2 = 16.086$ ,  $P= .000$ ). There is a need to make the use of the DHIS-2 platform a global  
33 public health concern in fragile health systems for robust decision-making process.

---

34

## 35 **Introduction**

36 There is a global consensus that the Health Information System (HIS) plays a pivotal role in  
37 advancing Universal Health Coverage (UHC) [1, 2]. According to Sunny *et al.*[3], the HIS requires  
38 resources and regular monitoring of health data from the points of care to national level in order to  
39 inform decision making process for sustainable health outcomes in countries [3].

40 In this regard, the HIS is transitioning from paper-based to electronic-based, with a view to  
41 comply with the rapid evolution of health technology for UHC, especially in developing  
42 countries[4]. In global public health perspective, the electronic-based HIS(eHIS) has been proven  
43 as a means to improve quality data while aligning fragmented reporting demands from bilateral  
44 and multilateral funding agencies, and policy makers[5, 6]. Evidence suggests that the utilization  
45 of eHIS is crucial in informing credible decision-making for UHC[7].

46 Currently, many developing countries are implementing DHIS-2 as electronic-based data  
47 management system to achieve UHC[8]. Worryingly, strong emphasis has been placed at national,  
48 regional, and provincial levels – Many technical health workers in both health district offices and  
49 health facilities who are supposed to significantly contribute in the use and operationalization of  
50 the DHIS-2 platform are left behind[9, 10].

51 In Burundi, the DHIS-2 platform has been introduced in the health system since 2014 in order  
52 to strengthen the health system in data management and respond to both National Health Policy  
53 and National Plan for Health Development [11]. Regardless of the financial and technical efforts  
54 of the Ministry of Health and funding agencies to operationalize the DHIS-2 platform at local  
55 levels, the HIS is still facing many challenges such as: (i) utilization of paper-based system when  
56 collecting data in the health district offices and health facilities – this leads to several number of  
57 mistakes in data reporting system; and (ii) the lack of connection or network for data entry and  
58 reporting in such offices and facilities. This is compromising health data quality for robust UHC-  
59 related decision making process [12, 13].

60 Extensive research has shown that involving technical health workers in using and  
61 operationalizing the DHIS-2 platform for health data management can lead to expected health  
62 outcomes [14-18]. It remains unclear whether socio-demographic factors may influence such  
63 outcomes – to our knowledge, no studies are interested in learning the association between socio-  
64 demographic factors and the use of the DHIS-2 platform at this moment.

65 The aim of this study was to investigate the socio-demographic factors of health workers that  
66 are associated with their utilization of the DHIS-2 platform in Burundi.

## 67 **Materials and methods**

### 68 **Study setting**

69 This study was conducted in Burundi, a country with fragile health system. The DHIS-2 is an  
70 essential resource that Burundi is adopting to transition the health system to digitalization and  
71 accelerate the achievement of UHC. To do so, Burundi intends to train key health system staff on  
72 DHIS-2 utilization and provide them with the necessary technology to collect and analyze health  
73 data in order to promote evidence-informed decision making process for UHC, from community

74 to national levels[4]. We are interested in confirming or infirming this null hypothesis: “there is no  
75 relationship between socio-demographic factors and the use of the DHIS-2 platform in Burundi.”

## 76 **Study design**

77 We conducted a cross-sectional study amongst health workers involved in collecting and validating  
78 data in health facilities. We chose this design for two major reasons. First, the design is usually  
79 used for population-based surveys and is quite inexpensive. Second, a cross-sectional survey  
80 proved to be easy to conduct[19]. We have no particular reason for framing our survey duration –  
81 we stopped the survey after we had reached the entire expected population of our study. This took  
82 four months, from July 3 to October 29, 2023. However, one year before a decade of DHIS-2  
83 platform utilization in Burundi [4], we thought that it was vital to learn about socio-demographic  
84 factors that can influence the utilization of such a platform.

## 85 **Study population and sampling methods**

86 The study population was the health workers that are involved in health data collection and  
87 validation at the points of care. We used a multi-stage sampling method to identify and select  
88 participants from the study population as indicated below.

89 **Stage 1:** We purposively chose three of Burundi's 18 health provinces based on their geographical  
90 location to ensure that health workers from rural and urban provinces of the country were  
91 represented. Kirundo and Cankunzo were chosen because, according to our knowledge of the  
92 context, they are the most geographically remote provinces in Burundi, with limited internet access  
93 to operationalize the DHIS-2 platform. The two provinces may represent health workers from  
94 remotest areas. Muramvya province was chosen because it is located between the political and  
95 economic capital of the country – the province may be representative of health workers from both  
96 urban and semi-urban areas in Burundi.

97 **Stage 2:** Census-based sampling of health district offices – the three provinces have respectively  
98 two, four, and two health district offices, which were all included in the study. In total the study  
99 included eight health district offices.

100 **Stage 3:** The eight health districts have a total of 137 health facilities (public and private), of which  
101 we selected 76 at random. We excluded 44 private health facilities from the sample because they  
102 frequently have no publicly accessible data[20] – this should decrease the robustness of our  
103 findings. We used the sample calculator (<http://www.raosoft.com/samplesize.html>) to determine  
104 the sample size of 76 from the population size of 93, applying a confidence level of 95%. We  
105 established a list of the 93 health facilities and then used the Random Number Table to  
106 systematically pick the 76 health facilities.

107 **Stage 4:** In each of the 76 health facilities, we chose one participant who was available during the  
108 data collecting period between the data and health facility manager. Furthermore, we recruited a  
109 DHIS-2 manager from each of the eight health district offices because they are directly involved  
110 in data validation in health facilities. At the end, 84 health workers took part in our study.

#### 111 **Data collection**

112 We applied the survey method to collect data because it was most appropriate for our study design  
113 [19]. After a pilot survey of 20 health data managers picked by convenience from 20 health  
114 facilities outside of our study sites, we used the Cronbach's alpha test (0.809) to validate our  
115 questionnaire. The latter was also validated by DHIS-2 experts working in the department of the  
116 National Health Information System in Burundi. Data were collected at a single point in time, with  
117 no follow-up. Participants were found at capacity-building meetings organized by the Ministry of  
118 Health at the health district level. We applied the technique of self-administered survey to distribute  
119 the questionnaire in-person. Respondents filled the questionnaire in the presence of the researcher  
120 to answer any clarification questions and check that all items were responded to. The questionnaire

121 was in French, which is the official language used in Burundi. We translated the French version of  
122 transcribed data in English.

### 123 **Measurement variables**

124 We measured four groups of dependent variables termed DHIS-2 management tools[21, 22].

125 First, there is a group of six variables related to **administrative support** including internet  
126 availability; financial resource allocation in DHIS-2 by health facility; health facility engagement  
127 with DHIS-2 functionality; health facility encouragement on DHIS-2 utilization, availability of  
128 technical support; and satisfaction with DHIS-2 training.

129 Second, the group of eleven variables related to **DHIS-2 design** comprising required security  
130 elements ; data transfer security ; data protection against modification; assurance of personal  
131 privacy; learning ease ; interoperability assurance; ease of use; compatibility with primary health  
132 information tools such as patient records and registers; compatibility with current health facility  
133 management tools; national health information system design; and compatibility with national  
134 health policy objective.

135 Third, a group of five variables connected to **DHIS-2 effect on data utilization** such as  
136 efficiency and effectiveness of operations; improvement of quality information, information  
137 management improvement; enhancement of health information accessibility; and information error  
138 minimization.

139 Fourth, a group of four variables linked with **services provision** that consist of quality services  
140 improvement; increase of health services volume; operational cost reduction; and efficiency  
141 enhancement.

142 Independent variables included two groups of socio-demographic characteristics(factors) of  
143 health workers. There is a group of five demographic characteristics comprising gender, marital  
144 status, age, educational level, and geographical area of work (remote and urban or semi-urban areas

145 expressed here in terms of province). The other is a group of professional characteristics including  
146 years with DHIS-2 utilization, place of work (facility level and health district office), time travel  
147 to service, and function of the health worker (health facility or data manager). These variables were  
148 chosen based on the study of Jamebozorgi *et al.* [23].

#### 149 **Data analysis**

150 The latest version of SPSS (version 25), was used to organize and analyze data. We utilized Chi-  
151 Square test to measure the association between the four groups of dependent variables (related to  
152 the DHIS-2 platform utilization) and the socio-demographic factors described above. Based on the  
153 alpha level of 0.05, we used the results from Chi-Square test to estimate the degree of significance  
154 and decide whether to reject or keep the null hypothesis.

#### 155 **Ethics**

156 After explaining the goal of the study, every participant was asked to give oral and written consent  
157 to participate. For those who accepted to participate, the following statement was written at the  
158 beginning of the questionnaire sheet: “I accept to take part in this study. I acknowledge that I am  
159 aware of the purpose of this study and that I am over 18 years of age.”

160 Every respondent jointly signed the fulfilled questionnaire with the researcher, which also  
161 included informed consent. The researcher took the original filled questionnaire, whereas the  
162 respondent kept a copy of the original filled questionnaire.

163 The General Directorate of Health Services Provision and Accreditations granted the study the  
164 ethical approval (N/Réf: 635/52/DGOSA/2023).

165

166

167 **Results**

168 Table 1 indicates categories and frequencies of sociodemographic factors studied.

169 **Table 1. Socio-demographic factors**

| Variables                      | Categories              | Numbers | Frequency (%) |
|--------------------------------|-------------------------|---------|---------------|
| Gender                         | Male                    | 69      | 82.1          |
|                                | Female                  | 15      | 17.9          |
| Marital status                 | Married                 | 69      | 82.1          |
|                                | Single                  | 15      | 17.9          |
| Age in years                   | <=40                    | 71      | 84.5          |
|                                | >40                     | 13      | 15.4          |
| Years with DHIS-2 utilization  | <=5                     | 63      | 75            |
|                                | >5                      | 21      | 25            |
| Place of work                  | Health center           | 67      | 79.8          |
|                                | Hospital                | 9       | 10.7          |
|                                | District office         | 8       | 9.5           |
| Time travel to service in hour | ≤1                      | 57      | 67.8          |
|                                | >1                      | 27      | 32.1          |
| Province                       | Cankuzo                 | 25      | 29.7          |
|                                | Kirundo                 | 30      | 35.7          |
|                                | Muramvya                | 29      | 34.5          |
| Educational level              | High school diploma     | 56      | 66.7          |
|                                | University level        | 28      | 33.3          |
| Health worker function         | Health facility manager | 19      | 22.6          |
|                                | Data manager            | 65      | 77.4          |

170  
171 Eighty-four participants from 76 health facilities and 8 health district offices responded to the  
172 questionnaire. Most of them were male (82.1%), married (82.1%), less than or equal to 40 years of  
173 age (84.5%), less than or equal to 5 years of experience (75%), data manager (77.4%), from health  
174 centers (79.8%), with a travel time to service of equal or less than one hour (67.8%), from Kirundo  
175 province (35.7%), and with a secondary level of education (66.7%).

176



177 **Chi-square test results for independent and dependent variables**

178 We decided to report only statistically significant results in order to confidently visualize the  
 179 influence of our factors of interest, which resulted in the rejection of the aforementioned null  
 180 hypothesis.

181

182 **Table 1. Chi-square test of socio-demographic factors and DHIS-2 effect on data utilization**

| Factors                        |            | Improvement of quality information              |          |          |            |      |
|--------------------------------|------------|-------------------------------------------------|----------|----------|------------|------|
|                                |            | Disagree or neutral                             | Agree    | $\chi^2$ | Cramer's V | P    |
| Marital status                 | Single     | 3(20.0)                                         | 12(80.0) | 6.437    | .277       | .011 |
|                                | Married    | 2(2.9)                                          | 67(97.1) |          |            |      |
| Time travel to service in hour | ≤1         | 0(0.0)                                          | 57(100)  | 11.224   | .366       | .001 |
|                                | >1         | 5(18.5)                                         | 22(81.5) |          |            |      |
|                                |            | Information management improvement              |          |          |            |      |
|                                |            | Disagree or neutral                             | Agree    | $\chi^2$ | Cramer's V | P    |
| Marital status                 | Single     | 2(13.3)                                         | 13(86.7) | 5.053    | .245       | .025 |
|                                | Married    | 1(1.4)                                          | 68(98.6) |          |            |      |
| Time travel to service in hour | ≤1         | 0(0.0)                                          | 57(100)  | 6.568    | .280       | .010 |
|                                | >1         | 3(11.1)                                         | 24(88.9) |          |            |      |
|                                |            | Information error minimization                  |          |          |            |      |
|                                |            | Disagree or neutral                             | Agree    | $\chi^2$ | Cramer's V | P    |
| Educational level              | Secondary  | 5(8.9)                                          | 51(91.1) | 7.243    | .294       | .007 |
|                                | University | 9(32.1)                                         | 19(67.9) |          |            |      |
|                                |            | Enhancement of health information accessibility |          |          |            |      |
|                                |            | Disagree or neutral                             | Agree    | $\chi^2$ | Cramer's V | P    |
| Gender                         | Female     | 5(33.3)                                         | 10(66.7) | 7.995    | .309       | .005 |
|                                | Male       | 5(7.2)                                          | 64(92.8) |          |            |      |

183

184 Marital status and time travel to service were significantly associated with both improvement of  
 185 quality information ( $\chi^2= 6.437$ ,  $P= .011$  and  $\chi^2= 11.224$ ,  $P= .001$ ) and information management  
 186 ( $\chi^2= 5.053$ ,  $P=.025$  and  $\chi^2 = 6.568$ ,  $P=.010$ ). For this improvement of quality information and health

187 information management, the marital status included 97.1% and 80.0% of married participants, and  
 188 98.6% and 86.7% of single participants, respectively.

189 The time travel to service included 100% of participants taking equal or less than one hour to  
 190 reach the point of service, whereas participants taking more than one hour to reach the point of  
 191 service represented 81.5% for the improvement of quality information and 88.9% for the  
 192 improvement of the health information management.

193 Gender was significantly associated with the enhancement of health information accessibility  
 194 ( $\chi^2= 7.995$ ,  $P=.005$ ), with 92.8% for males and 66.7% for females.

195 Information error minimization was significantly associated with educational level ( $\chi^2 = 7.243$ ,  
 196  $P=.007$ ), with 91.1% for a secondary level and 67.9% for university level.

197

198 **Table 3. Chi-square test analysis of socio-demographic factors and DHIS-2 administrative support**

| Factor                         | Satisfaction with DHIS-2 training |          |          | $\chi^2$ | Cramer's V | P    |
|--------------------------------|-----------------------------------|----------|----------|----------|------------|------|
|                                | Disagree or Neutral               | Agree    |          |          |            |      |
| Time travel to service in hour | ≤1                                | 2(42.1)  | 33(57.9) | 16.374   | .442       | .000 |
|                                | >1                                | 24(88.9) | 3(11.1)  |          |            |      |

199

200 The time travel to service was significantly associated with satisfaction on DHIS-2 training ( $\chi^2 =$   
 201  $16.374$ ,  $P= .000$ ). Participants with a time travel to service of one hour or less represented 57.9%  
 202 whereas participants with a time travel to service of more than one hour represented 11.1%.

203

204

205

206

207

208 **Tableau 4. Chi-square test analysis of socio-demographic factors and DHIS-2 design**

| <b>Factors</b>         |                         | <b>Compatibility with current health facility management tools</b> |              |          |                   |          |
|------------------------|-------------------------|--------------------------------------------------------------------|--------------|----------|-------------------|----------|
|                        |                         | <b>Disagree or Neutral</b>                                         | <b>Agree</b> | $\chi^2$ | <b>Cramer's V</b> | <b>P</b> |
| Time travel to service | <=1hour                 | 9(15.8)                                                            | 48(84.2)     | 4.726    | .237              | .030     |
|                        | >1hour                  | 10 (37.0)                                                          | 17(63.0)     |          |                   |          |
|                        |                         | <b>National health information system design</b>                   |              |          |                   |          |
|                        |                         | <b>Disagree or neutral</b>                                         | <b>Agree</b> | $\chi^2$ | <b>Cramer's V</b> | <b>P</b> |
| Time travel to service | <=1hour                 | 9(15.8)                                                            | 48(84.2)     | 8.023    | .309              | .005     |
|                        | >1hour                  | 12(44.4)                                                           | 15(55.6)     |          |                   |          |
|                        |                         | <b>In line with primary health information tools</b>               |              |          |                   |          |
|                        |                         | <b>Disagree or neutral</b>                                         | <b>Agree</b> | $\chi^2$ | <b>Cramer's V</b> | <b>P</b> |
| Time travel to service | <=1hour                 | 8(14.0)                                                            | 49(86.0)     | 9.339    | .333              | .002     |
|                        | >1hour                  | 12(44.4)                                                           | 15(55.6)     |          |                   |          |
|                        |                         | <b>Compatibility with the national health policy objective</b>     |              |          |                   |          |
|                        |                         | <b>Disagree or neutral</b>                                         | <b>Agree</b> | $\chi^2$ | <b>Cramer's V</b> | <b>P</b> |
| Profession             | Data manager            | 13(20.0)                                                           | 52(80.0)     | 4.496    | .231              | .034     |
|                        | Health facility manager | 0(0.0)                                                             | 19(100.0)    |          |                   |          |
| Time travel to service | <=1hour                 | 4(7.0)                                                             | 53(93.0)     | 9.699    | .340              | .002     |
|                        | >1hour                  | 9(33.3)                                                            | 18(66.7)     |          |                   |          |
|                        |                         | <b>Ease to use</b>                                                 |              |          |                   |          |
|                        |                         | <b>Disagree or neutral</b>                                         | <b>Agree</b> | $\chi^2$ | <b>Cramer's V</b> | <b>P</b> |
| Province               | Cankuzo                 | 19(76.0)                                                           | 6(24.0)      | 10.28    | .350              | .006     |
|                        | Kirundo                 | 10(33.3.7)                                                         | 20(66.7)     |          |                   |          |
|                        | Muramvya                | 17(58.6)                                                           | 12(41.4)     |          |                   |          |
|                        |                         | <b>Required security elements</b>                                  |              |          |                   |          |
|                        |                         | <b>Disagree or neutral</b>                                         | <b>Agree</b> | $\chi^2$ | <b>Cramer's V</b> | <b>P</b> |
| Time travel to service | <=1hour                 | 4(7.0)                                                             | 53(93.0)     | 14.20    | .411              | .000     |
|                        | >1hour                  | 11(40.7)                                                           | 16(59.3)     |          |                   |          |
|                        |                         | <b>Data transfer security</b>                                      |              |          |                   |          |
|                        |                         | <b>Disagree or neutral</b>                                         | <b>Agree</b> | $\chi^2$ | <b>Cramer's V</b> | <b>P</b> |
| Time travel to service | <=1hour                 | 9(15.8)                                                            | 48(84.2)     | 6.288    | .0274             | .012     |
|                        | >1hour                  | 11(40.7)                                                           | 16(59.3)     |          |                   |          |
|                        |                         | <b>Data protection against modification</b>                        |              |          |                   |          |
|                        |                         | <b>Disagree or neutral</b>                                         | <b>Agree</b> | $\chi^2$ | <b>Cramer's V</b> | <b>P</b> |
| Time travel to service | <=1hour                 | 6(10.5)                                                            | 51(89.5)     | 6.497    | .278              | .011     |
|                        | >1hour                  | 9(33.3)                                                            | 18(66.7)     |          |                   |          |
|                        |                         | <b>Assurance of personal privacy</b>                               |              |          |                   |          |
|                        |                         | <b>Disagree or neutral</b>                                         | <b>Agree</b> | $\chi^2$ | <b>Cramer's V</b> | <b>P</b> |
| Time travel to service | <=1hour                 | 4(7.0)                                                             | 53(93.0)     | 7.650    | .302              | .006     |
|                        | >1hour                  | 8(29.6)                                                            | 19(70.4)     |          |                   |          |
|                        |                         | <b>Learning ease</b>                                               |              |          |                   |          |
|                        |                         | <b>Disagree or neutral</b>                                         | <b>Agree</b> | $\chi^2$ | <b>Cramer's V</b> | <b>P</b> |
| Education level        | Secondary               | 29(51.8)                                                           | 27(48.2)     | 4.175    | .223              | .041     |
|                        | University level        | 21(75.0)                                                           | 7(25.0)      |          |                   |          |
|                        |                         | <b>Interoperability assurance</b>                                  |              |          |                   |          |
|                        |                         | <b>Disagree or neutral</b>                                         | <b>Agree</b> | $\chi^2$ | <b>Cramer's V</b> | <b>P</b> |
| Province               | Cankuzo                 | 20(80.0)                                                           | 5(20.0)      | 16.08    | .438              | .000     |
|                        | Kirundo                 | 9(30.0)                                                            | 21(70.0)     |          |                   |          |
|                        | Muramvya                | 20(69.0)                                                           | 9(31.0)      |          |                   |          |

209 The time travel to service was significantly associated with: (i)DHIS-2 compatibility with health  
210 facility management tools ( $\chi^2 = 4.726$ ,  $P=.030$ ), (ii)national health information system design ( $\chi^2$   
211  $= 8.023$ ,  $P=.005$ ), (iii)compatibility with primary health information tools such as patient records  
212 and registers ( $\chi^2 = 9.339.023$ ,  $P=.002$ ), (iv)compatibility with the national health policy objective  
213 ( $\chi^2= 9.699$ ,  $P=.002$ ), (v)required security elements ( $\chi^2= 14.205$ ,  $P=.000$ ), (vi)data transfer security  
214 ( $\chi^2= 6.288$ ,  $P=.012$ ), (vii)data protection against modification ( $\chi^2= 6.497$ ,  $P=.011$ ),and  
215 (viii)assurance of personal privacy ( $\chi^2 = 7.650$ ,  $P=.006$ ). Participants with a time travel equal to  
216 or less than one hour represented respectively 84.2%, 84.2%, 86.0%, 93.0%, 93.0%, 84.2%,  
217 89.5%, and 93.0%.

218 Health worker function was significantly associated with the DHIS-2 compatibility with the  
219 national health policy objective ( $\chi^2=4.496$ ,  $P=.034$ ) in 100% of health managers and 80% of data  
220 managers and the geographical area of work (province) was associated with DHIS-2 ease of use  
221 and interoperability assurance ( $\chi^2= 10.287$ ,  $P= .006$  and;  $\chi^2 = 16.086$ ,  $P= .000$ ). The remotest area  
222 represented respectively 66.7% and 70% (Kirundo province), 24.0% and 20.0% (Cankuzo  
223 province). The urban and semi-urban areas represented respectively 41.4 % and 31.0% (Muramvya  
224 province). Educational level was significantly associated with learning ease ( $\chi^2 = 4.175$ ,  $P=.041$ ),  
225 the secondary level represented 48.2%.

226

## 227 **Discussion**

228 To our knowledge, this is the first study exploring the socio-demographic factors associated with  
229 the use of the DHIS-2 platform in Burundi. It taken place in three of the country's 18 provinces.  
230 The Majority of the 84 participants were male (82.1%) amongst them, 79.8% came from health  
231 centers. Similarly, a study in Sierra Leone found that 77% of DHIS-2 users were male[21]. In

232 contrast, a Brazilian study found that females were the most frequent users, with no relation to  
233 socio-economic factors [24].

234 The male gender was more associated with the DHIS-2 effect on the enhancement of health  
235 information access ( $\chi^2 = 7.995$ ,  $P = .005$ ) than the female gender. These findings are consistent with  
236 that of a previous study conducted in Ethiopia, where male gender was significantly associated  
237 with knowledge of electronic health records [25]. In contrast, a study in Nigeria found the female  
238 gender significantly associated with the use of electronic health information [26] – surprisingly,  
239 the DHIS-2 necessitates regular use of computers and the internet, and a large body of literature  
240 indicates that the males use computers and the internet more frequently than females [27, 28].

241 Marital status was significantly associated with both improvement of quality information ( $\chi^2 =$   
242  $6.437$ ,  $P = .011$ ) and health information management ( $\chi^2 = 5.053$ ,  $P = .025$ ). These findings tie with  
243 previous studies in the USA, wherein being married was significantly associated with the use of  
244 digital health interventions [29]. Two major reasons could explain this observation. First, it seems  
245 possible that married health workers have a more stable place of residence than single ones – this  
246 may give married health workers a sense of stability and emotional support, which may have a  
247 positive influence on their services. Second, the increased responsibilities of married health  
248 workers in the family, may increase the perceived value of their job.

249 The lower time travel to reach health workplace was significantly associated with the  
250 improvement of quality information ( $\chi^2 = 11.224$ ,  $P = .001$ ) and health information management  
251 ( $\chi^2 = 6.568$ ,  $P = .010$ ), training on DHIS-2 ( $\chi^2 = 16.374$ ,  $P = .000$ ), DHIS-2 compatibility with health  
252 facility management tools ( $\chi^2 = 4.726$ ,  $P = .030$ ), national health information system design ( $\chi^2 =$   
253  $8.023$ ,  $P = .005$ ), compatibility with primary health information tools such as records and patient  
254 registers ( $\chi^2 = 9.339$ ,  $P = .002$ ) and the national health policy objective ( $\chi^2 = 9.699$ ,  $P = .002$ ),  
255 required security elements ( $\chi^2 = 14.205$ ,  $P = .000$ ), data transfer security ( $\chi^2 = 6.288$ ,  $P = .012$ ), data

256 protection against modification ( $\chi^2= 6.497$ ,  $P= .011$ ), and assurance of personal privacy ( $\chi^2=$   
257  $7.650$ ,  $P= .006$ ). These results reflect those reported in a study conducted in West Asia, which  
258 found that short time travel from home to the point of primary healthcare services has increased  
259 health workers performance and satisfaction [30]. According to a study conducted in America  
260 amongst 1044 physicians, the use of electronic health records has significantly increased work at  
261 home overtime – so, it is possible that the use of DHIS-2 can also extend work at home: health  
262 workers living nearest the point of service reach their home early and gain more time to explore  
263 DHIS-2[31].

264 Our study found that lower educational level was higher significantly associated with  
265 information error minimization ( $\chi^2= 7.243$ ,  $P= .007$ ) and learning ease ( $\chi^2 = 4.175$ ,  $P= .041$ )  
266 compared to higher educational level. These findings corroborate the results of previous studies  
267 conducted in Turkey and Albania, which indicated that low education level was associated with  
268 job satisfaction[32,33]. Research conducted in developed countries have found that a higher  
269 education level is associated with higher e-health utilization [34-36]. Another study conducted in  
270 Burundi on satisfaction with performance-based financing(PBF) has found that lower education  
271 level was associated with error minimization in electronic-based data reporting[37]. Our findings  
272 can be explained by the low wage levels observed amongst health workers with a high level of  
273 education in Burundi. In the same line, experience in developing countries has demonstrated that  
274 higher education increases the demand for higher-level positions and considerations amongst  
275 health workers [35]. When that demand is not satisfied, it can lead to work demotivation [38, 39].  
276 According to our experiences in the Burundi health system, there is no clear separation of task  
277 attribution amongst health workers with different levels of education. For example, health workers  
278 with secondary education have the same roles and responsibilities as health workers with university

279 degrees in eHIS management. Furthermore, there is no clear distinction between general and  
280 specialist doctors in terms of health data generation (i.e., specialized consultations are most of the  
281 time devoted to general doctors). This could explain the increased level of significance of  
282 information error minimization reported in health workers with lower education levels compared  
283 to those with higher education levels.

284 The health worker function was significantly associated with DHIS-2 compatibility with the  
285 national health policy objective ( $\chi^2 = 4.496$ ,  $P = .034$ ). These findings are in line with previous  
286 findings from Asia that show a significant association between health workers occupation and  
287 electronic health utilization[40,41]. Our results can be explained by the differences in  
288 understanding the national health policy and the vision of the Ministry of Health amongst health  
289 workers. Experience has shown that health facility managers are more likely to participate in  
290 multiple trainings organized by the Ministry of Health and funded by its funding agencies, gaining  
291 knowledge of the Ministry of Health's national health policy and vision, whereas other health  
292 workers receive limited trainings focused to their daily tasks.

293 Another interesting finding was that the geographical area of work (province) was significantly  
294 associated with DHIS-2 ease of use and interoperability assurance ( $\chi^2 = 10.287$ ,  $P = .006$ ;  $\chi^2 =$   
295  $16.086$ ,  $P = .000$ ) with high rates in Kirundo province – 66.7% and 70%, respectively. Kirundo  
296 Province was one of the provinces that piloted DHIS-2 in the Burundi health system. The higher  
297 significance reported in this province can thus be explained by its extended experience with DHIS-  
298 2 utilization in comparison to the other provinces studied.

299

### 300 **Limitations**

301 This study mainly used quantitative methods for data collection and analysis. We are convinced  
302 that using only quantitative information cannot lead to solid inferences tailored to the context of

303 the Burundi health system. Qualitative studies focusing on the behaviors of both health workers  
304 and health system management should provide additional information that can go beyond the scope  
305 of the current study.

306

## 307 **Conclusion**

308 Our study indicated that a significant number of socio-demographic factors are associated with the  
309 use of DHIS-2 platform in the Burundi health system. This association is more significant in  
310 remotest areas with long experience of DHIS-2 operationalization compared to urban and semi-  
311 urban areas. Also, the higher level of education was negatively associated with the use of DHIS-2  
312 platform. Given that decisions are made by highly educated health workers (only medical doctors  
313 in the Burundi health system), this may jeopardize the quality of the decision-making process for  
314 universal health coverage. The other important learning from our study is that the use of DHIS-2  
315 platform increases time spent at home by health workers in charge of eHIS management. This  
316 implies that the use of DHIS-2 can promote telework, which is one of the strategies that the Burundi  
317 health system can use to incentivize eHIS managers and enhance their wellbeing by working from  
318 home for a set period of time. In sum, there is a need to make the use of the DHIS-2 platform a  
319 global public health concern in fragile health systems for robust decision making process to achieve  
320 Universal Health Coverage.

321

## 322 **Acknowledgements**

323 To the Ministry of Health of Burundi, especially the General Directorate of Health Services and  
324 the Directorates of Kirundo, Cankuzo and Muramvya Health Provinces, for granting permission to  
325 collect data. To the health facility and district managers for facilitating the data collection process.



326 **Author contributions**

327 **Conceptualization:** Innocent Yandemye, Alexandre Nimubona

328 **Data curation :** Innocent Yandemye

329 **Formal analysis :** Innocent Yandemye

330 **Funding acquisition:** Not applicable

331 **Investigation:** Innocent Yandemye

332 **Methodology:** Alexandre Nimubona, Innocent Yandemye

333 **Project administration:** Innocent Yandemye

334 **Resources:** Innocent Yandemye, Alexandre Nimubona

335 **Software:** Innocent Yandemye

336 **Supervision:** Innocent Yandemye

337 **Validation :** Alexandre Nimubona

338 **Visualization :** Innocent Yandemye, Alexandre Nimubona

339 **Writing – original draft :** Innocent Yandemye

340 **Writing – review & editing:** Alexandre Nimubona

341

342 **References**

343 1.Kruk ME, Gage AD, Arsenault C, Jordan K, Leslie HH, Roder-DeWan S, et al. High-quality

344 health systems in the Sustainable Development Goals era: time for a revolution. *The Lancet*

345 *global health*. 2018;6(11):e1196-e252. DOI:[https://doi.org/10.1016/S2214-109X\(18\)30386-3](https://doi.org/10.1016/S2214-109X(18)30386-3).

346 2.AbouZahr C, Boerma T. Health information systems: the foundations of public health. *Bulletin*

347 *of the World Health Organization*. 2005;83:578-83.

- 348 3. Ibeneme S, Karamagi H, Muneene D, Goswami K, Chisaka N, Okeibunor J. Strengthening  
349 health systems using innovative digital health technologies in Africa. *Frontiers in Digital Health*.  
350 2022;4:854339. <https://doi.org/10.3389/fdgth.2022.854339>
- 351 4. Verbeke F, Kaze S, Ajeneza L, Nkurunziza L, Sindatuma G, Hassan A, et al. Implementing  
352 Burundi's national e-health enterprise architecture: past, present and future. *Journal of Health  
353 Informatics in Africa*. 2017;4(1). <https://doi.org/10.12856/JHIA-2017-v4-i1-178>
- 354 5. Mon DT. American Health Information Management Association (AHIMA) Written and Oral  
355 Testimony at the NCVHS Privacy, Confidentiality and Security Subcommittee Hearing on  
356 Personal Health Records May 20, 2009. AHIM AtestimonyonPHRprivacy-final052009 pdf  
357 ([http://www.ahima.org/downloads/pdfs/advocacy/AHIM AtestimonyonPHRprivacy-final052009](http://www.ahima.org/downloads/pdfs/advocacy/AHIM_AtestimonyonPHRprivacy-final052009)  
358 pdf)(Accessed: 1 December 2010). 2009.
- 359 6. Bowman S. Impact of electronic health record systems on information integrity: quality and  
360 safety implications. *Perspectives in health information management*. 2013;10(Fall).
- 361 7. Haux R. Health information systems—past, present, future. *International journal of medical  
362 informatics*. 2006;75(3-4):268-81. <https://doi.org/10.1016/j.ijmedinf.2005.08.002>.
- 363 8. Sahay S, Rashidian A, Doctor HV. Challenges and opportunities of using DHIS2 to strengthen  
364 health information systems in the Eastern Mediterranean Region: A regional approach. *The  
365 Electronic Journal of Information Systems in Developing Countries*. 2020;86(1):e12108.  
366 <https://doi.org/10.1002/isd2.12108>.
- 367 9. Simba DO. PRACTICE POINTS Application of ICT in strengthening health information  
368 systems in developing countries in the wake of globalisation. *African health sciences*.  
369 2004;4(3):194-8.
- 370 10. Saunders-Hastings P, editor DHIS2 as a tool for health impact assessment in low-resource  
371 settings: examining opportunities for expanding use of routine health data. *Proceedings of the*

- 372 38th annual conference of the international association for impact assessment Durban, South  
373 Africa; 2018.
- 374 11.Nyssen F, Kaze S, Mugisho E, editors. Using TOGAF for Building a National.  
375 Implementation Strategy for E-Health Services and Technologies in Burundi. Proceedings of the  
376 Fourth International Conference on Telecommunications and Remote Sensing; 2015. DOI:  
377 10.5220/0005890100980103.
- 378 12.Begum T, Khan SM, Adamou B, Ferdous J, Parvez MM, Islam MS, et al. Perceptions and  
379 experiences with district health information system software to collect and utilize health data in  
380 Bangladesh: a qualitative exploratory study. BMC health services research. 2020;20(1):1-13.
- 381 13.DE LA LUTTE CONTRE LS. REPUBLIQUE DU BURUNDI. 2021.
- 382 14.Anacleto JC, Fels SS. Lessons from ICT design of a healthcare worker-centered system for a  
383 chronic mental care hospital. CHI'14 Extended Abstracts on Human Factors in Computing  
384 Systems2014. p. 1687-92. <https://doi.org/10.1145/2559206.2581260>.
- 385 15.Park HS, Kim KI, Chung H-Y, Jeong S, Soh JY, Hyun YH, et al. A worker-centered personal  
386 health record app for workplace health promotion using national health care data sets: design and  
387 development study. JMIR medical informatics. 2021;9(8):e29184. doi: 10.2196/29184.
- 388 16.Anacleto J, Fels S, Calderon R. Lessons from ICT Design at a Healthcare Worker-Centered  
389 System for a Chronic Mental Care Hospital (artigo convidado). Cadernos de Informática.  
390 2014;8(3):01-8.
- 391 17.Barrit S, Niset A. LogDoctor: an open and decentralized worker-centered solution for  
392 occupational management in healthcare. arXiv preprint arXiv:230509243. 2023.  
393 <https://doi.org/10.48550/arXiv.2305.09243>.
- 394 18.Kanfe SG, Endehabtu BF, Ahmed MH, Mengestie ND, Tilahun B. Commitment Levels of  
395 Health Care Providers in Using the District Health Information System and the Associated

- 396 Factors for Decision Making in Resource-Limited Settings: Cross-sectional Survey Study. *JMIR*  
397 *Med Inform.* 2021;9(3):e23951. doi: 10.2196/23951.
- 398 19.Wang X, Cheng Z. Cross-sectional studies: strengths, weaknesses, and recommendations.  
399 *Chest.* 2020;158(1):S65-S71. <https://doi.org/10.1016/j.chest.2020.03.012>.
- 400 20.Basu S, Andrews J, Kishore S, Panjabi R, Stuckler D. Comparative performance of private  
401 and public healthcare systems in low-and middle-income countries: a systematic review. *PLoS*  
402 *medicine.* 2012;9(6):e1001244. <https://doi.org/10.1371/journal.pmed.1001244>.
- 403 21.Khobi JA, Mtebe JS, Mbelwa JT. Factors influencing district health information system usage  
404 in Sierra Leone: A study using the technology-organization-environment framework. *The*  
405 *Electronic Journal of Information Systems in Developing Countries.* 2020;86(6):e12140.  
406 <https://doi.org/10.1002/isd2.12140>.
- 407 22.Wheatley D, Bickerton C. Time-use and Well-being Impacts of Travel-to-Work and  
408 Travel-for-Work. *New Technology, Work and Employment.* 2016;31(3):238-  
409 54. <https://doi.org/10.1111/ntwe.12074>.
- 410 23.Jamebozorgi MH, Karamoozian A, Bardsiri TI, Sheikhbardsiri H. Nurses burnout, resilience,  
411 and its association with socio-demographic factors during COVID-19 pandemic. *Frontiers in*  
412 *Psychiatry.* 2022;12:803506.
- 413 24.Padrini-Andrade L, Balda RdCX, Areco KCN, Bandiera-Paiva P, Nunes MdV, Marba STM,  
414 et al. Evaluation of usability of a neonatal health information system according to the user's  
415 perception. *Revista Paulista de Pediatria.* 2018;37:90-6. [https://doi.org/10.1590/1984-](https://doi.org/10.1590/1984-0462/2019;37;1;00019)  
416 [0462/2019;37;1;00019](https://doi.org/10.1590/1984-0462/2019;37;1;00019).
- 417 25.Wubante SM, Tegegne MD, Melaku MS, Mengiste ND, Fentahun A, Zemene W, et al.  
418 Healthcare professionals' knowledge, attitude and its associated factors toward electronic

- 419 personal health record system in a resource-limited setting: A cross-sectional study. *Frontiers in*  
420 *Public Health*. 2023;11:1114456. <https://doi.org/10.3389/fpubh.2023.1114456>.
- 421 26.Khairat S, Coleman C, Ottmar P, Bice T, Koppel R, Carson SS. Physicians' gender and their  
422 use of electronic health records: findings from a mixed-methods usability study. *Journal of the*  
423 *American Medical Informatics Association*. 2019;26(12):1505-14.  
424 <https://doi.org/10.1093/jamia/ocz126>.
- 425 27.Penard T, Poussing N, Mukoko B, Piaptie GBT. Internet adoption and usage patterns in  
426 Africa: Evidence from Cameroon. *Technology in Society*. 2015;42:71-80.  
427 <https://doi.org/10.1016/j.techsoc.2015.03.004>.
- 428 28.Olatoye R. Gender factor in computer anxiety, knowledge and utilization among senior  
429 secondary school students in Ogun State, Nigeria. *Gender and Behaviour*. 2009;7(2):2430-42.
- 430 29.Shah LM, Ding J, Spaulding EM, Yang WE, Lee MA, Demo R, et al. Sociodemographic  
431 characteristics predicting digital health intervention use after acute myocardial infarction. *Journal*  
432 *of cardiovascular translational research*. 2021;14(5):951-61.
- 433 30.Alameddine M, Baroud M, Kharroubi S, Hamadeh R, Ammar W, Shoaib H, et al.  
434 Investigating the job satisfaction of healthcare providers at primary healthcare centres in  
435 Lebanon: A national cross-sectional study. *Health & social care in the community*.  
436 2017;25(6):1805-16. <https://doi.org/10.1111/hsc.12454>.
- 437 31.Privitera MR, Atallah F, Dowling F, Gomez-DiCesare C, Hengerer A, Arnhart K, et al.  
438 Physicians' electronic health records use at home, job satisfaction, job stress and burnout. *J Hosp*  
439 *Adm*. 2018;7(4):52-9. <https://doi.org/10.5430/jha.v7n4p52>.
- 440 32.Zikusooka M, Elci OC, Özdemir H. Job satisfaction among Syrian healthcare workers in  
441 refugee health centres. *Human Resources for Health*. 2021;19(1):1-11.

- 442 33.Zahaj M, Saliaj A, Metani L, Nika S, Alushi E. Factors related to job satisfaction among  
443 nurses. *European Scientific Journal*. 2016;12(5).
- 444 34.Reiners F, Sturm J, Bouw LJ, Wouters EJ. Sociodemographic factors influencing the use of  
445 eHealth in people with chronic diseases. *International journal of environmental research and*  
446 *public health*. 2019;16(4):645. <https://doi.org/10.3390/ijerph16040645>.
- 447 35.Terschüren C, Mensing M, Mekel OC. Is telemonitoring an option against shortage of  
448 physicians in rural regions? Attitude towards telemedical devices in the North Rhine-Westphalian  
449 health survey, Germany. *BMC Health Services Research*. 2012;12(1):1-9.
- 450 36.Rixon L, P. Hirani S, Cartwright M, Beynon M, Selva A, Sanders C, et al. What influences  
451 withdrawal because of rejection of telehealth—the whole systems demonstrator evaluation. *Journal*  
452 *of Assistive Technologies*. 2013;7(4):219-27. <https://doi.org/10.1108/JAT-06-2013-0017>.
- 453 37.Innocent Y, Kang S, Konlan KD. The factors that influence performance-based financing in  
454 primary health care provision in Muramvya province, Burundi. *Journal of Global Health Science*.  
455 2023;5. <https://doi.org/10.35500/jghs.2023.5.e4>.
- 456 38.Asegid A, Belachew T, Yimam E. Factors influencing job satisfaction and anticipated  
457 turnover among nurses in Sidama zone public health facilities, South Ethiopia. *Nursing research*  
458 *and practice*. 2014;2014. <https://doi.org/10.1155/2014/909768>.
- 459 39.Ganzach Y. Intelligence, education, and facets of job satisfaction. *Work and Occupations*.  
460 2003;30(1):97-122. <https://doi.org/10.1177/0730888402239328>.
- 461 40.Al Tarawneh RS. The Effect of Electronic Health Systems on Job Satisfaction and Teamwork  
462 of Healthcare Workers: A Case Study on King Hussein Cancer Center: Princess Sumaya  
463 University for Technology (Jordan); 2022.

464 41.Tubaishat A. Perceived usefulness and perceived ease of use of electronic health records  
465 among nurses: Application of Technology Acceptance Model. Informatics for Health and Social  
466 Care. 2018;43(4):379-89. <https://doi.org/10.1080/17538157.2017.1363761>.  
467
